# Supplementary material for: Binary gene vectors based on hyperbranched poly(l-lactide-co-polyglycerol) and polyethylenimine for prolonged transgene expression via co-assembly with DNA into fiber core–shell triplexes
Source: Royal Society of Chemistry journal article supplement (doi:10.1039/c3tb21150a), 2013-01-01
Supplement: c3tb21150a.pdf [file c3tb21150a.pdf]

Supporting materials:

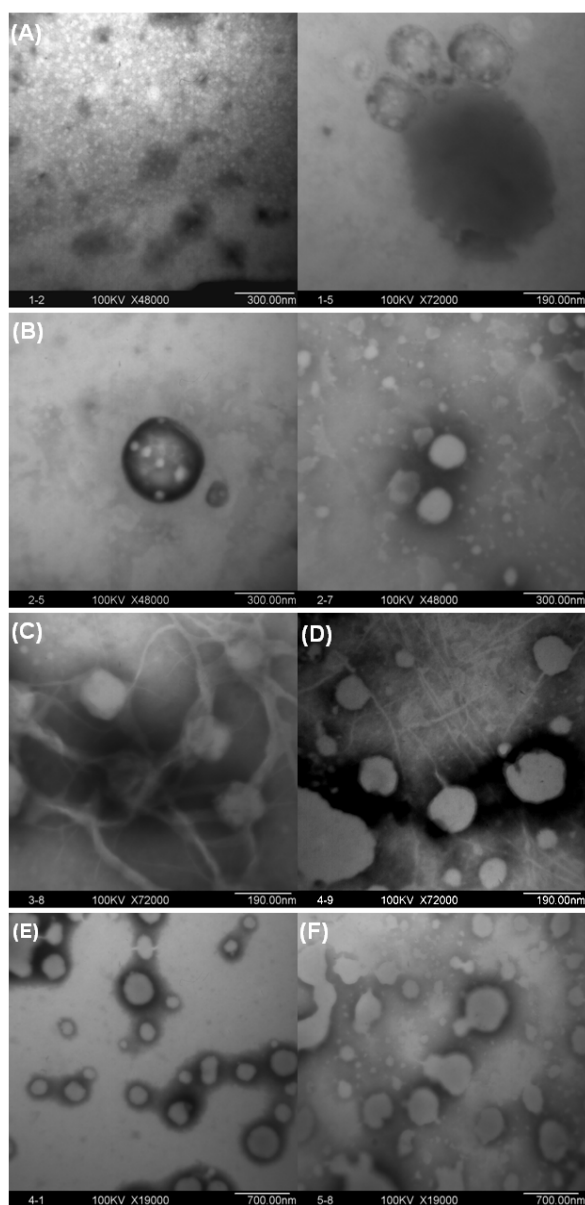

**Fig. S1** TEM images of PG6-PLA/PEI25k/DNA at (A) 0.26:1.3:1 (w), (B) 0.65:1.3:1, (C) 1.3:1.3:1, (D) 16.1:1.3:1 and PG6-PLA particles in (E) 95% and (F) 30% ethanol.

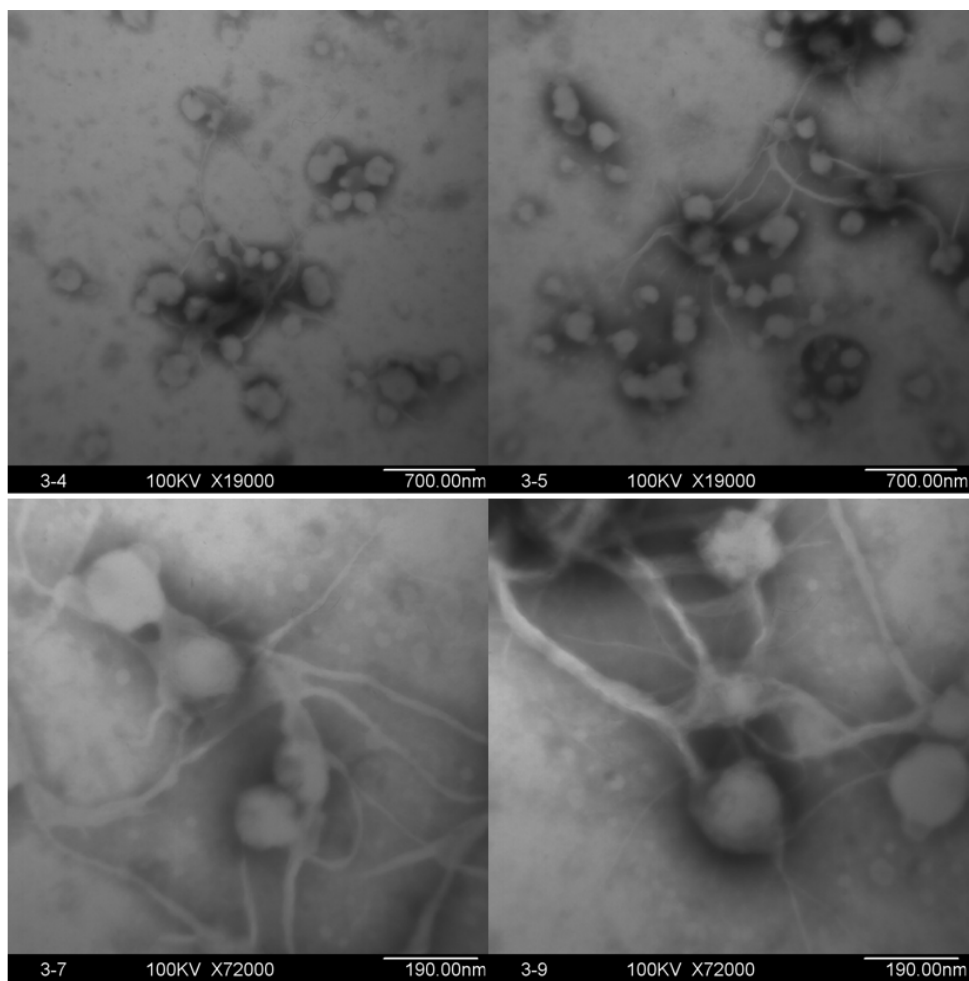

**Fig. S2** TEM images of the fiber core-shell nanostructure of PG6-PLA/PEI/DNA at weight ratio of 1.3:1.3:1.

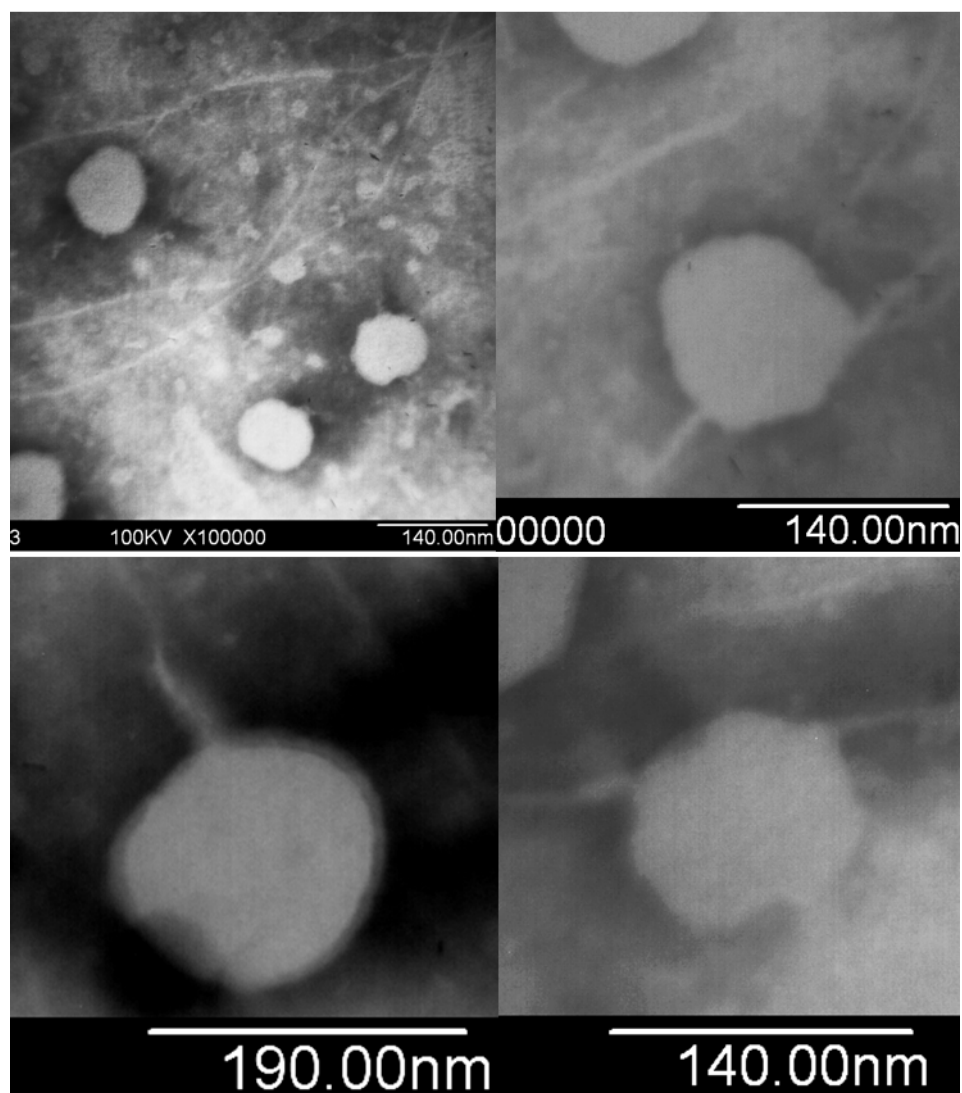

**Fig. S3** TEM images of the fiber core-shell nanostructure of PG6-PLA/PEI/DNA at weight ratio of 16.1:1.3:1.

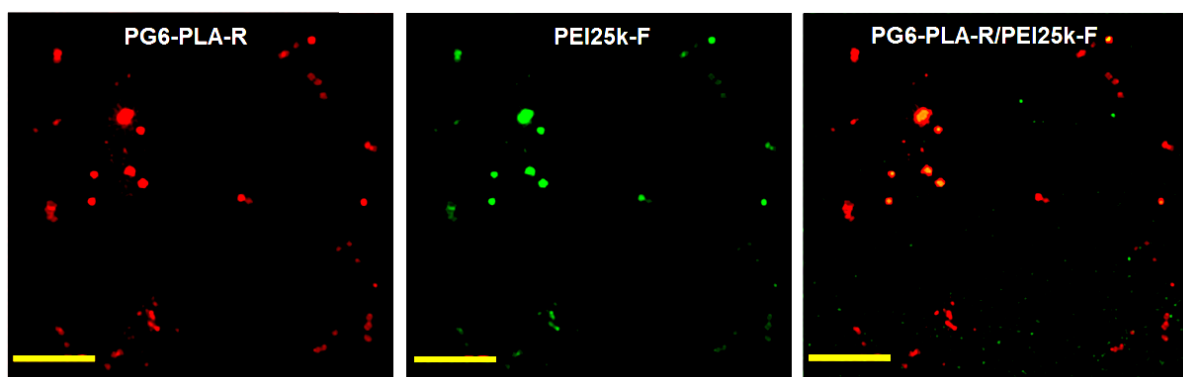

**Fig. S4** Co-assembly ability of PG6-PLA-R and PEI25k-F. PG6-PLA-R and PEI25k-F were dispersed in 30% ethanol and DI water, respectively, and then they were blended (w/w=1) for 30 min at 37°C. The particles were supplemented to DMEM medium containing 10% fetal bovine serum. Scale bar: 20  $\mu\text{m}$ . Confocal laser scanning microscope was used to observe the PG6-PLA-R/PEI25k-F binary vectors.

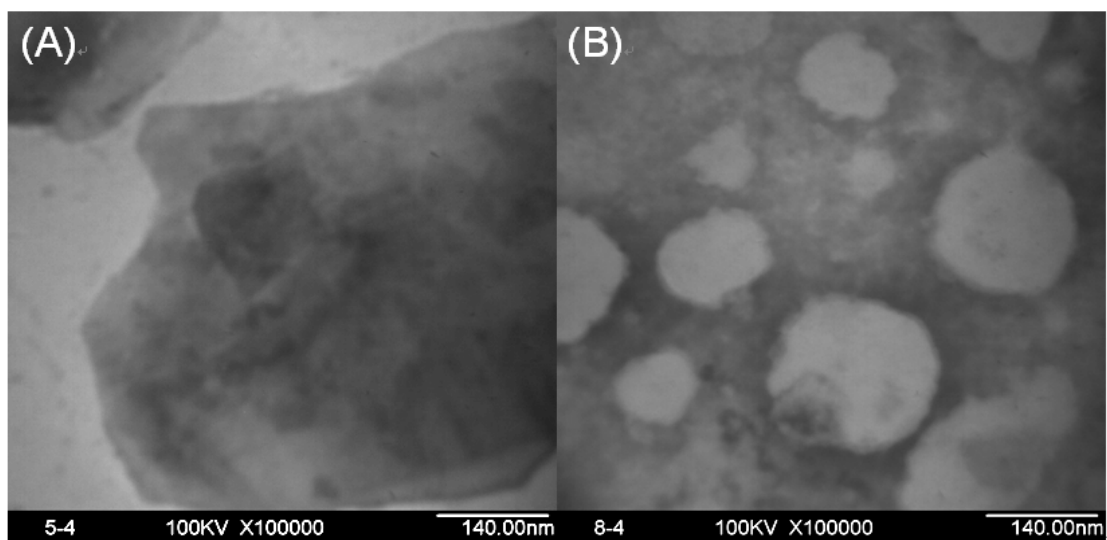

**Fig. S5** TEM images of DNA absent PG6-PLA/PEI complexes at weight ratios of (A) 1:1 and (B) 16.1:1.3.

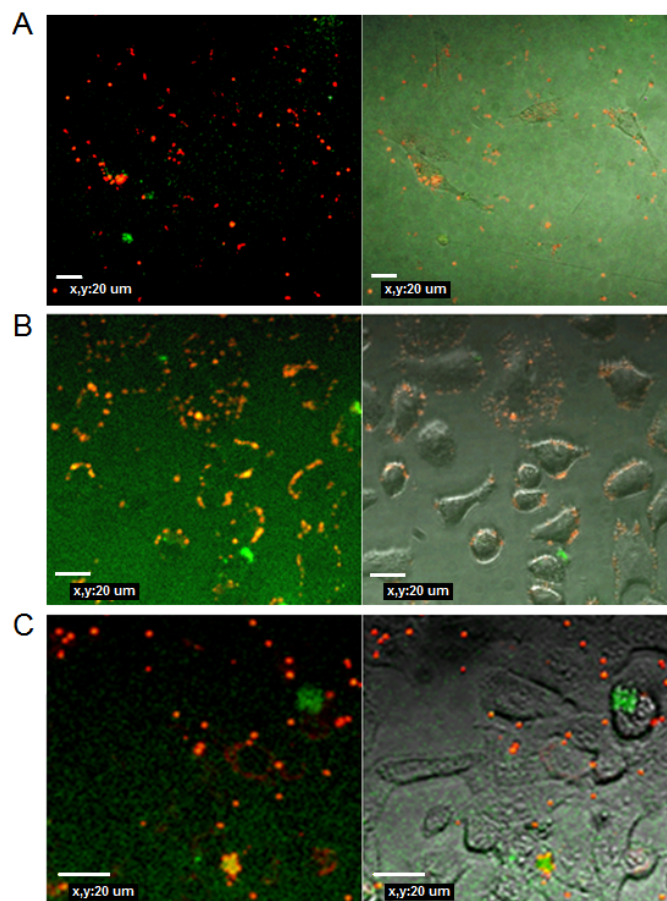

**Fig. S6** Adsorption of PG6-PLA-R/PEI25k-F binary vectors to mouse embryonic fibroblast cell line NIH 3T3 (A), human cervical carcinoma cell line HeLa (B), and hepatocarcinoma cell line HepG2 (C). After 12 h of seedling, the cells were co-cultivated with the polymers for 6 hours and observed by confocal laser scanning microscopy. Dosage of PG6-PLA-R and PEI25k-F was 10  $\mu\text{g}/\text{mL}$ , respectively. Scale bar: 20  $\mu\text{m}$ .
